# Supplementary material for: Selective CO2 adsorption in a microporous metal–organic framework with suitable pore sizes and open metal sites
Source: Royal Society of Chemistry journal article supplement (doi:10.1039/c5qi00025d), 2015-01-01
Supplement: c5qi00025d1.pdf [file c5qi00025d1.pdf]

Supporting Information for

**Selective CO<sub>2</sub> adsorption in a microporous metal–organic framework  
with suitable pore sizes and open metal sites**

Bo Liu,<sup>a</sup> Ya-Hui Jiang,<sup>a</sup> Zhi-Sen Li,<sup>a</sup> Lei Hou<sup>a</sup> and Yao-Yu Wang<sup>\*a</sup>

<sup>a</sup>Key Laboratory of Synthetic and Natural Functional Molecule Chemistry of the Ministry of Education, College of Chemistry & Materials Science, Northwest University, Xi'an 710069,

China. E-mail: wyaoyu@nwu.edu.cn

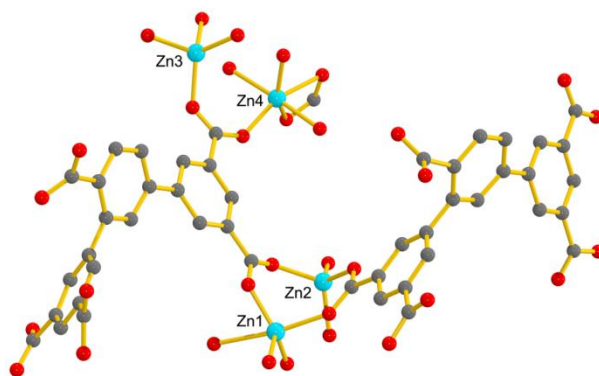

**Fig. S1** The coordination environment of Zn<sup>2+</sup> ions in **1**·DMF, the hydrogen atoms and solvent molecules are omitted.

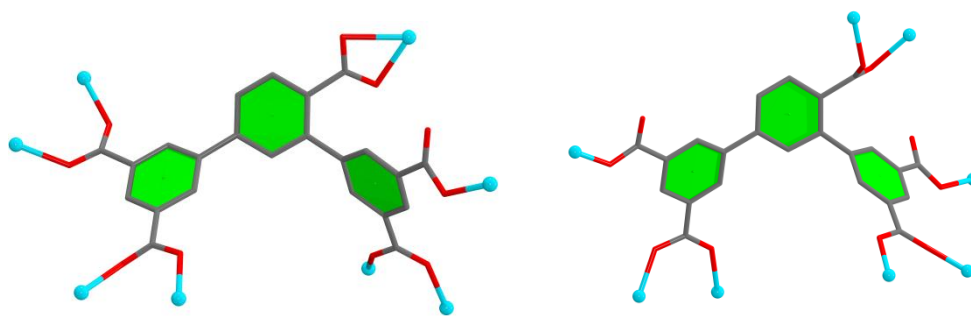

**Fig. S2** The two coordination modes of the  $L^{5-}$  ligands in **1**·DMF, one exhibits  $\mu^1-\eta^1$ , *syn-syn*- $\mu^1-\eta^1:\eta^1$ , *syn-syn*- $\mu^2-\eta^1:\eta^1$ , and *syn-anti*- $\mu^2-\eta^1:\eta^1$  (left), the other adopts  $\mu^1-\eta^1$ , and *syn-anti*- $\mu^2-\eta^1:\eta^1$  (right).

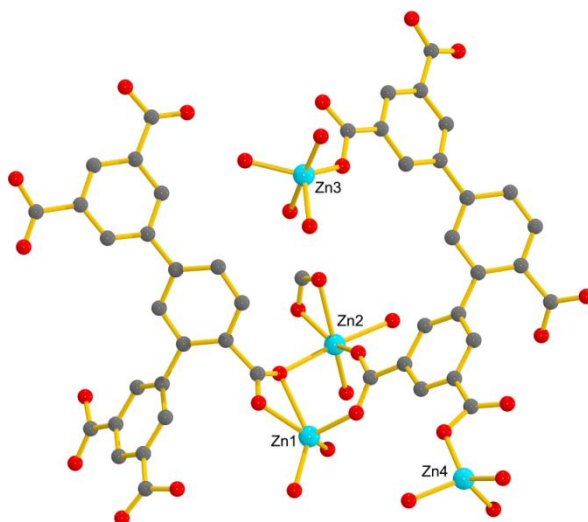

**Fig. S3** The coordination environment of  $Zn^{2+}$  ions in **1**·DMA.

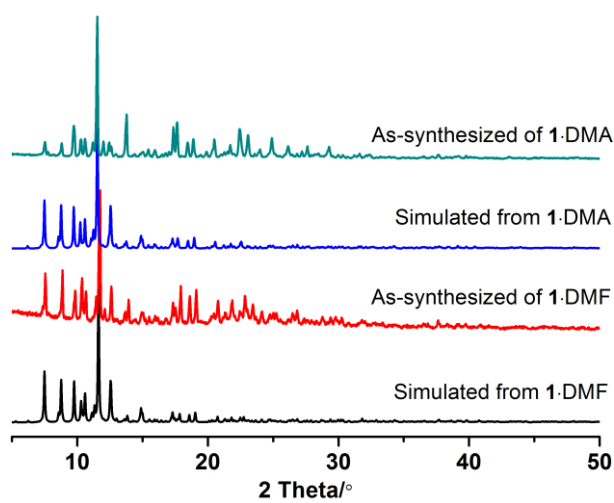

**Fig. S4** PXRD patterns (from bottom to top) for **1**·DMF (Simulated), **1**·DMF (As-synthesized), **1**·DMA (Simulated), and **1**·DMA (As-synthesized).

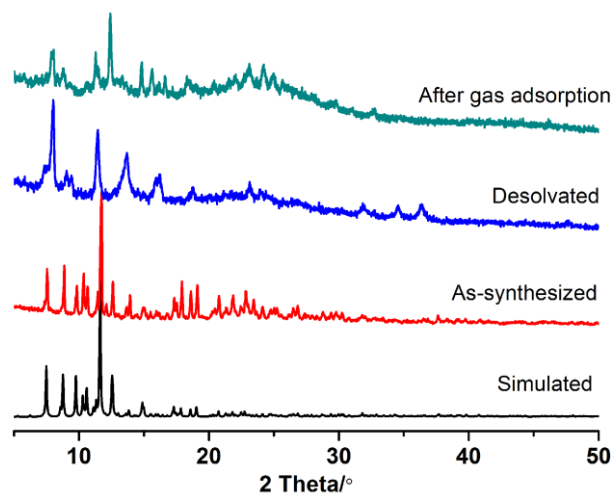

**Fig. S5** PXR D patterns of 1·DMF simulated from the X-ray single-crystal structure, experimental samples, desolvated samples, and after gas adsorption samples.

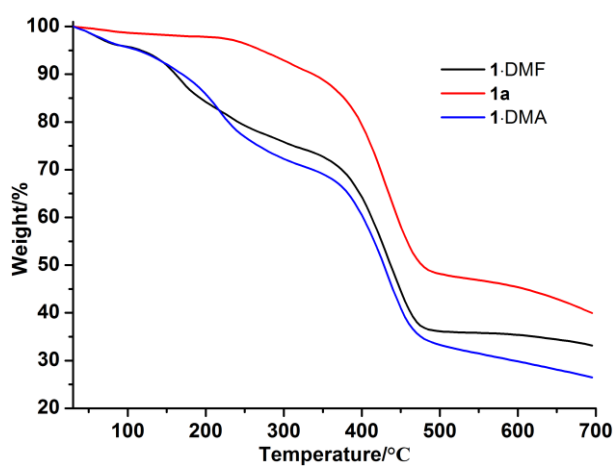

**Fig. S6** TGA plots of complexes 1·DMF (black), 1·DMA (blue), and 1a (red).

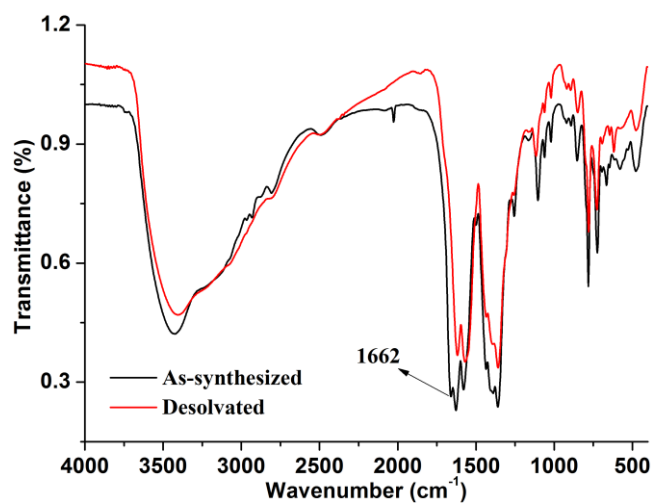

**Fig. S7** IR spectra of the as-synthesized (1·DMF) and desolvated (1a).

### IAST adsorption selectivity calculation:

The experimental isotherm data for pure CO<sub>2</sub>, CH<sub>4</sub> and N<sub>2</sub> (measured at 298) were fitted using a Langmuir-Freundlich (L-F) model:

$$q = \frac{a * b * P^c}{1 + b * P^c}$$

Where  $q$  and  $p$  are adsorbed amounts and pressures of component  $i$ , respectively.

The adsorption selectivities for binary mixtures of CO<sub>2</sub>/CH<sub>4</sub> and CO<sub>2</sub>/N<sub>2</sub>, defined by

$$S_{i/j} = \frac{x_i * y_j}{x_j * y_i}$$

were calculated using the Ideal Adsorption Solution Theory (IAST) of Myers and Prausnitz.

Where  $x_i$  is the mole fraction of component  $i$  in the adsorbed phase and  $y_i$  is the mole fraction of component  $i$  in the bulk.

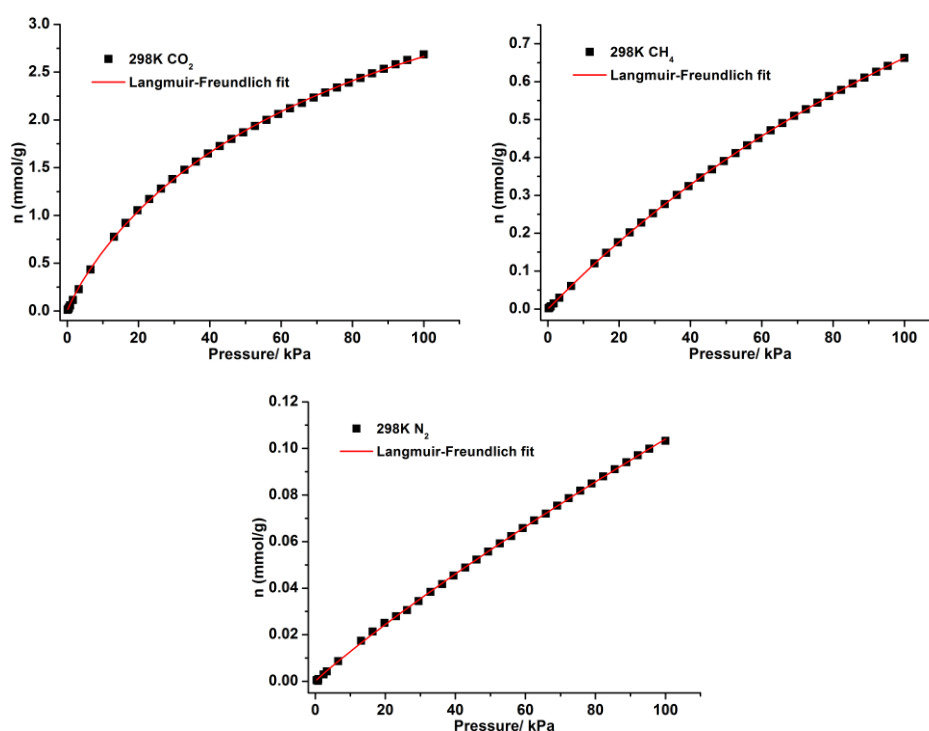

**Fig. S8** CO<sub>2</sub> adsorption isotherms of **1a** with fitting by L-F model:  $a = 5.06407$ ,  $b = 0.01767$ ,  $c = 0.89890$ ,  $\text{Chi}^2 = 1.41 \times 10^{-4}$ ,  $R^2 = 0.99982$ ; CH<sub>4</sub> adsorption isotherms of **1a** with fitting by L-F model:  $a = 1.97982$ ,  $b = 0.00471$ ,  $c = 1.01417$ ,  $\text{Chi}^2 = 4.69 \times 10^{-7}$ ,  $R^2 = 0.99999$ ; N<sub>2</sub> adsorption isotherms of **1a** with fitting by L-F model:  $a = 0.57497$ ,  $b = 0.00125$ ,  $c = 94615$ ,  $\text{Chi}^2 = 2.17 \times 10^{-7}$ ,  $R^2 = 0.99983$ .

### Calculation of sorption heat for CO<sub>2</sub> uptake using Virial 2 model

$$\ln P = \ln N + 1/T \sum_{i=0}^m aiN^i + \sum_{i=0}^n biN^i \quad Q_{st} = -R \sum_{i=0}^m aiN^i$$

The above equation was applied to fit the combined CO<sub>2</sub> isotherm data for desolvated **1a** at 273 and 298 K, where  $P$  is the pressure,  $N$  is the adsorbed amount,  $T$  is the temperature,  $ai$  and  $bi$  are virial coefficients, and  $m$  and  $n$  are the number of coefficients used to describe the isotherms.  $Q_{st}$  is the coverage-dependent enthalpy of adsorption and  $R$  is the universal gas constant.

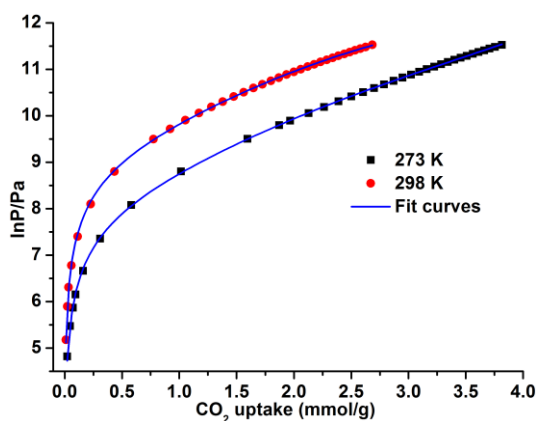

**Fig. S9** CO<sub>2</sub> adsorption isotherms for **1a** with fitting by Virial 2 model. Fitting results:  $a_0 = -3616.97213$ ,  $a_1 = 207.96409$ ,  $a_2 = -107.43727$ ,  $a_3 = 34.35126$ ,  $a_4 = 2.99692$ ,  $b_0 = 21.79273$ ,  $b_1 = -0.85783$ ,  $b_2 = 0.79230$ ,  $b_3 = -0.23580$ ,  $\chi^2 = 0.00006$ ,  $R^2 = 0.99983$ .

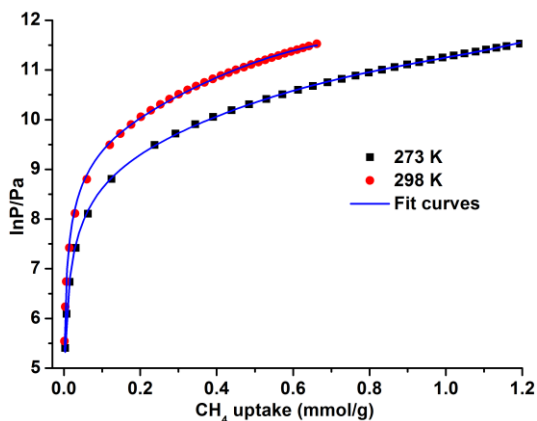

**Fig. S10** CH<sub>4</sub> adsorption isotherms for **1a** with fitting by Virial 2 model. Fitting results:  $a_0 = -2635.48544$ ,  $a_1 = 2968.21695$ ,  $a_2 = -10730.33007$ ,  $a_3 = 9400.63156$ ,  $a_4 = 485.17455$ ,  $b_0 = 20.64613$ ,  $b_1 = -12.02875$ ,  $b_2 = 43.76530$ ,  $b_3 = -39.25892$ ,  $\chi^2 = 0.00203$ ,  $R^2 = 0.99921$ .

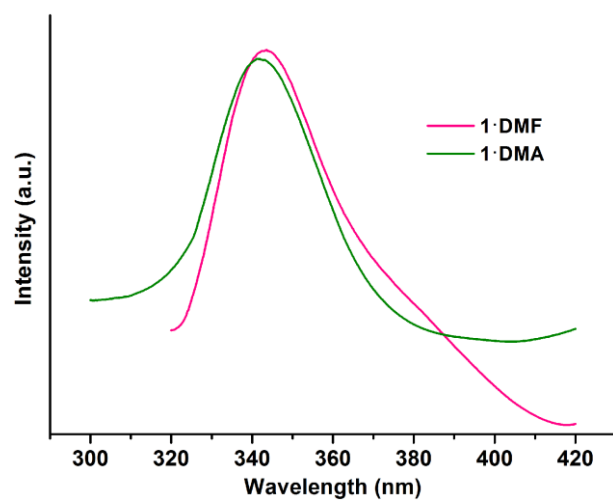

**Fig. S11** Excitation spectra of 1·DMF and 1·DMA in the solid state at room temperature.
